# Supplementary material
Source: Springer Nature journal article supplement (https://www.springermedizin.de/resource/supplementary/12933_2011_465_MOESM2_ESM.pdf/9538536)

Age-adjusted survivor functions

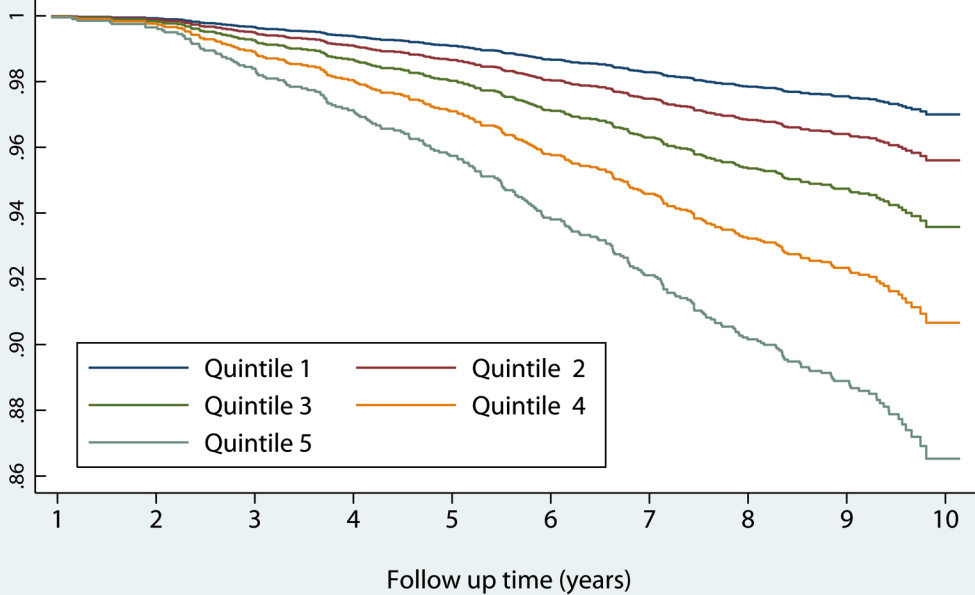

Supplement: MOESM2 [file 9538536]
